# Supplementary material for: Probing the catalytic functions of Bub1 kinase using the small molecule inhibitors BAY-320 and BAY-524
Source: eLife. 2016 Feb 17;5:e12187. doi: 10.7554/eLife.12187 (PMC4769170; doi:10.7554/eLife.12187)
Supplement: Supplementary file 3. — In vitro kinase-selectivity profile of BAY-320. Results are based on an active site-directed competition-binding assay using a panel of 403 human kinases (DiscoverX Kinome Scan, Lead Hunter). Results show ligand binding at 300 and 1000 nM BAY-320 relative to control condition. DOI: http://dx.doi.org/10.7554/eLife.12187.020 [file elife-12187-supp3.xlsx]

## Sheet: Tabelle1
DiscoverX Kinase Panel
Target	BAY-320
Gene Symbol	%Ctrl @ 300nM	%Ctrl @ 1000nM
BUB1	0	0.3
LOK	72	53
SRPK1	76	56
TTK	89	59
DDR1	78	62
RIPK2	90	67
RSK1(Kin.Dom.2-C-terminal)	100	69
NDR1	100	70
STK35	78	71
PAK6	92	71
PKMYT1	94	71
PDGFRB	89	72
RIPK5	100	72
MRCKB	78	73
STK16	88	73
MST2	100	73
FES	90	74
FGR	100	76
GRK3	72	77
HIPK3	75	77
GRK2	80	77
KIT	93	77
QSK	89	78
CDK8	89	79
MAP3K15	91	79
MARK3	93	80
JNK3	83	81
EPHA6	90	81
GSK3B	94	81
DMPK2	100	81
TLK1	92	82
PLK3	100	82
SRPK2	100	82
EPHB4	100	83
CIT	66	84
ERK3	100	84
TAOK2	100	84
HPK1	62	85
MRCKA	100	85
NLK	85	86
DCAMKL1	95	86
ASK2	100	86
MINK	98	87
AURKC	100	87
RIOK2	77	88
BMX	79	88
CDK3	79	88
EGFR	100	88
MKNK2	69	89
PDGFRA	80	89
GSK3A	85	89
LIMK1	90	89
CAMK1D	95	89
RIOK3	96	89
EPHA2	99	89
DCAMKL2	100	89
MYO3A	100	89
CSNK2A1	83	90
NEK3	86	90
PRKD2	88	90
RIPK4	100	90
ZAK	82	91
PAK3	67	92
NEK4	73	92
FGFR3	75	92
HUNK	85	92
MAP3K1	87	92
SIK2	88	92
SgK110	89	92
PKN2	95	92
INSRR	82	93
MAP4K3	89	93
MEK1	94	93
ERN1	97	93
MET	100	93
YANK3	100	93
TIE1	85	94
AXL	99	94
CSNK1G2	100	94
NEK5	100	94
SRMS	100	94
p38-delta	77	95
TNNI3K	90	95
MUSK	94	95
STK33	95	95
PLK2	100	95
RIPK1	100	95
RSK4(Kin.Dom.2-C-terminal)	100	95
ACVR2A	100	96
CDC2L2	100	96
ERK1	100	96
MAP4K5	100	96
PIK4CB	76	97
MST4	88	97
MAP3K2	98	97
AKT2	100	97
BRK	100	97
FLT3	100	97
TAOK1	100	97
MAP3K3	78	98
ERK8	96	98
ACVR2B	100	98
MAP3K4	100	98
CDKL2	90	99
MYLK	92	99
CAMK1B	94	99
MTOR	94	99
TXK	96	99
ICK	97	99
BRAF	100	99
CDKL1	100	99
LIMK2	100	99
NEK9	53	100
EPHA7	70	100
LTK	72	100
PIP5K2C	73	100
TRPM6	73	100
CLK3	75	100
OSR1	75	100
DRAK2	76	100
SBK1	76	100
PRKG1	77	100
ERK4	79	100
ULK1	80	100
DRAK1	81	100
DYRK2	81	100
ULK3	81	100
MEK4	82	100
NDR2	83	100
PCTK1	83	100
JNK1	84	100
AKT3	85	100
CDK9	86	100
MLCK	86	100
DYRK1B	87	100
HCK	87	100
HIPK1	87	100
LCK	87	100
MST1	87	100
PAK1	88	100
S6K1	88	100
SLK	88	100
AAK1	89	100
ERBB2	89	100
GCN2(Kin.Dom.2,S808G)	89	100
MEK2	89	100
PIM3	89	100
PKAC-beta	89	100
ADCK3	90	100
PIK3CD	90	100
TSSK3	90	100
JAK1(JH2domain-pseudokinase)	91	100
NIK	91	100
RSK3(Kin.Dom.1-N-terminal)	91	100
DMPK	92	100
MAPKAPK5	92	100
MEK5	92	100
p38-gamma	92	100
PAK4	92	100
TNK2	92	100
AURKB	93	100
DYRK1A	93	100
ROS1	93	100
ACVR1	95	100
ALK	95	100
NEK7	95	100
PAK7	95	100
TNIK	95	100
EPHB1	96	100
IRAK4	96	100
MEK3	96	100
CASK	97	100
PCTK2	97	100
RSK4(Kin.Dom.1-N-terminal)	97	100
AMPK-alpha1	98	100
BMPR1B	98	100
PAK2	98	100
PLK1	98	100
RSK2(Kin.Dom.1-N-terminal)	98	100
CSNK2A2	99	100
EPHA3	99	100
MKK7	99	100
NIM1	99	100
ABL1-nonphosphorylated	100	100
ABL1-phosphorylated	100	100
ABL2	100	100
ACVR1B	100	100
ACVRL1	100	100
ADCK4	100	100
AKT1	100	100
AMPK-alpha2	100	100
ANKK1	100	100
ARK5	100	100
ASK1	100	100
AURKA	100	100
BIKE	100	100
BLK	100	100
BMPR1A	100	100
BMPR2	100	100
BRSK1	100	100
BRSK2	100	100
BTK	100	100
CAMK1	100	100
CAMK1G	100	100
CAMK2A	100	100
CAMK2B	100	100
CAMK2D	100	100
CAMK2G	100	100
CAMK4	100	100
CAMKK1	100	100
CAMKK2	100	100
CDC2L1	100	100
CDC2L5	100	100
CDK11	100	100
CDK2	100	100
CDK4	100	100
CDK4-cyclinD1	100	100
CDK4-cyclinD3	100	100
CDK5	100	100
CDK7	100	100
CDKL3	100	100
CDKL5	100	100
CHEK1	100	100
CHEK2	100	100
CLK1	100	100
CLK2	100	100
CLK4	100	100
CSF1R	100	100
CSK	100	100
CSNK1A1	100	100
CSNK1A1L	100	100
CSNK1D	100	100
CSNK1E	100	100
CSNK1G1	100	100
CSNK1G3	100	100
CTK	100	100
DAPK1	100	100
DAPK2	100	100
DAPK3	100	100
DCAMKL3	100	100
DDR2	100	100
DLK	100	100
EIF2AK1	100	100
EPHA1	100	100
EPHA4	100	100
EPHA5	100	100
EPHA8	100	100
EPHB2	100	100
EPHB3	100	100
EPHB6	100	100
ERBB3	100	100
ERBB4	100	100
ERK2	100	100
ERK5	100	100
FAK	100	100
FER	100	100
FGFR1	100	100
FGFR2	100	100
FGFR4	100	100
FLT1	100	100
FLT4	100	100
FRK	100	100
FYN	100	100
GAK	100	100
GRK1	100	100
GRK4	100	100
GRK7	100	100
HASPIN	100	100
HIPK2	100	100
HIPK4	100	100
IGF1R	100	100
IKK-alpha	100	100
IKK-beta	100	100
IKK-epsilon	100	100
INSR	100	100
IRAK1	100	100
IRAK3	100	100
ITK	100	100
JAK1(JH1domain-catalytic)	100	100
JAK2(JH1domain-catalytic)	100	100
JAK3(JH1domain-catalytic)	100	100
JNK2	100	100
LATS1	100	100
LATS2	100	100
LKB1	100	100
LRRK2	100	100
LYN	100	100
LZK	100	100
MAK	100	100
MAP4K2	100	100
MAP4K4	100	100
MAPKAPK2	100	100
MARK1	100	100
MARK2	100	100
MARK4	100	100
MAST1	100	100
MEK6	100	100
MELK	100	100
MERTK	100	100
MKNK1	100	100
MLK1	100	100
MLK2	100	100
MLK3	100	100
MST1R	100	100
MST3	100	100
MYLK2	100	100
MYLK4	100	100
MYO3B	100	100
NEK1	100	100
NEK10	100	100
NEK11	100	100
NEK2	100	100
NEK6	100	100
p38-alpha	100	100
p38-beta	100	100
PCTK3	100	100
PDPK1	100	100
PFTAIRE2	100	100
PFTK1	100	100
PHKG1	100	100
PHKG2	100	100
PIK3C2B	100	100
PIK3C2G	100	100
PIK3CA	100	100
PIK3CB	100	100
PIK3CG	100	100
PIKFYVE	100	100
PIM1	100	100
PIM2	100	100
PIP5K1A	100	100
PIP5K1C	100	100
PIP5K2B	100	100
PKAC-alpha	100	100
PKN1	100	100
PLK4	100	100
PRKCD	100	100
PRKCE	100	100
PRKCH	100	100
PRKCI	100	100
PRKCQ	100	100
PRKD1	100	100
PRKD3	100	100
PRKG2	100	100
PRKR	100	100
PRKX	100	100
PRP4	100	100
PYK2	100	100
RAF1	100	100
RET	100	100
RIOK1	100	100
ROCK1	100	100
ROCK2	100	100
RPS6KA4(Kin.Dom.1-N-terminal)	100	100
RPS6KA4(Kin.Dom.2-C-terminal)	100	100
RPS6KA5(Kin.Dom.1-N-terminal)	100	100
RPS6KA5(Kin.Dom.2-C-terminal)	100	100
RSK1(Kin.Dom.1-N-terminal)	100	100
RSK2(Kin.Dom.2-C-terminal)	100	100
RSK3(Kin.Dom.2-C-terminal)	100	100
SGK	100	100
SGK2	100	100
SGK3	100	100
SIK	100	100
SNARK	100	100
SNRK	100	100
SRC	100	100
SRPK3	100	100
STK36	100	100
STK39	100	100
SYK	100	100
TAK1	100	100
TAOK3	100	100
TBK1	100	100
TEC	100	100
TESK1	100	100
TGFBR1	100	100
TGFBR2	100	100
TIE2	100	100
TLK2	100	100
TNK1	100	100
TRKA	100	100
TRKB	100	100
TRKC	100	100
TSSK1B	100	100
TYK2(JH1domain-catalytic)	100	100
TYK2(JH2domain-pseudokinase)	100	100
TYRO3	100	100
ULK2	100	100
VEGFR2	100	100
VPS34	100	100
VRK2	100	100
WEE1	100	100
WEE2	100	100
WNK1	100	100
WNK2	100	100
WNK3	100	100
WNK4	100	100
YANK1	100	100
YANK2	100	100
YES	100	100
YSK1	100	100
YSK4	100	100
ZAP70	100	100
